# Supplementary material for: Fluoride Anion Recognition by a Multifunctional Urea Derivative: An Experimental and Theoretical Study
Source: PubMed Central journal article supplement (PMC4883349; doi:10.3390/s16050658), 2016-05-09
Supplement: sensors-16-00658-s001.pdf [file sensors-16-00658-s001.pdf]

# Supplementary Materials: Fluoride Anion Recognition by a Multifunctional Urea: An Experimental and Theoretical Study

Jana Schiller, Raúl Pérez-Ruiz, Diego Sampedro, Eugenia Marqués-López, Raquel P. Herrera and David Díaz Díaz

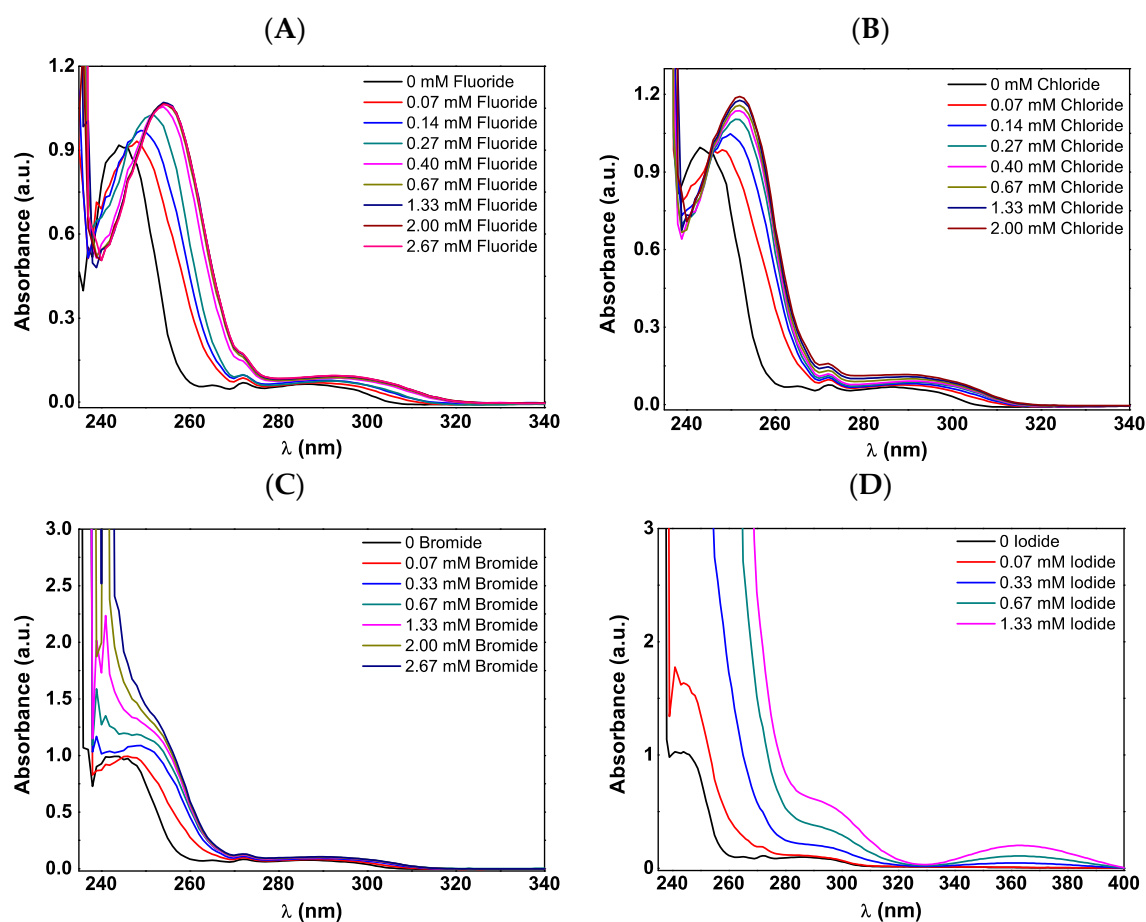

**Figure S1.** Absorption spectra of 1 (0.04 mM) in chloroform in the presence of increasing amounts of the corresponding halides: (A) Fluoride, (B) chloride, (C) bromide, (D) iodide.

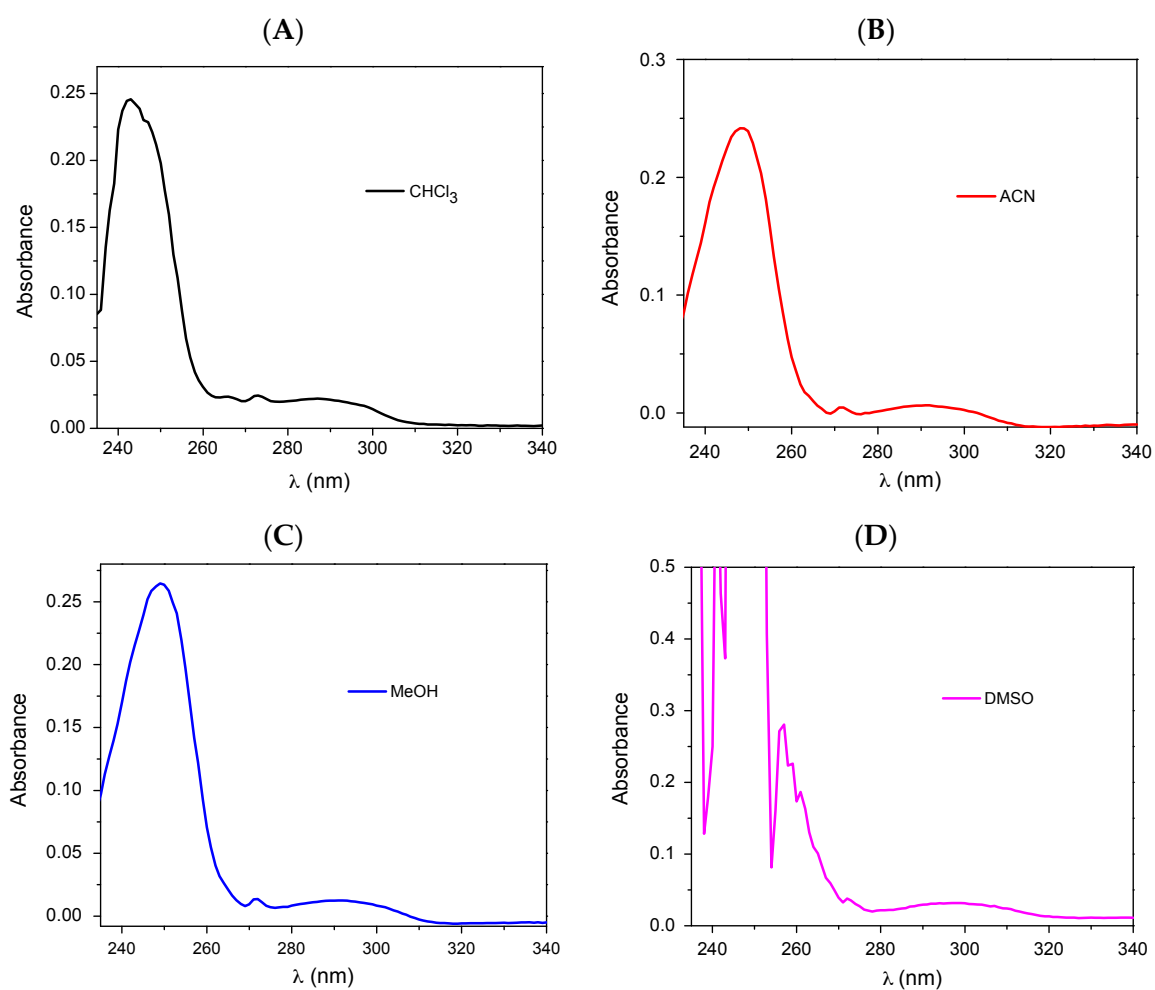

**Figure S2.** Absorption spectra of **1** (0.01 mM) in (A) chloroform, (B) acetonitrile, (C) methanol and (D) dimethylsulfoxide at room temperature under aerobic conditions.

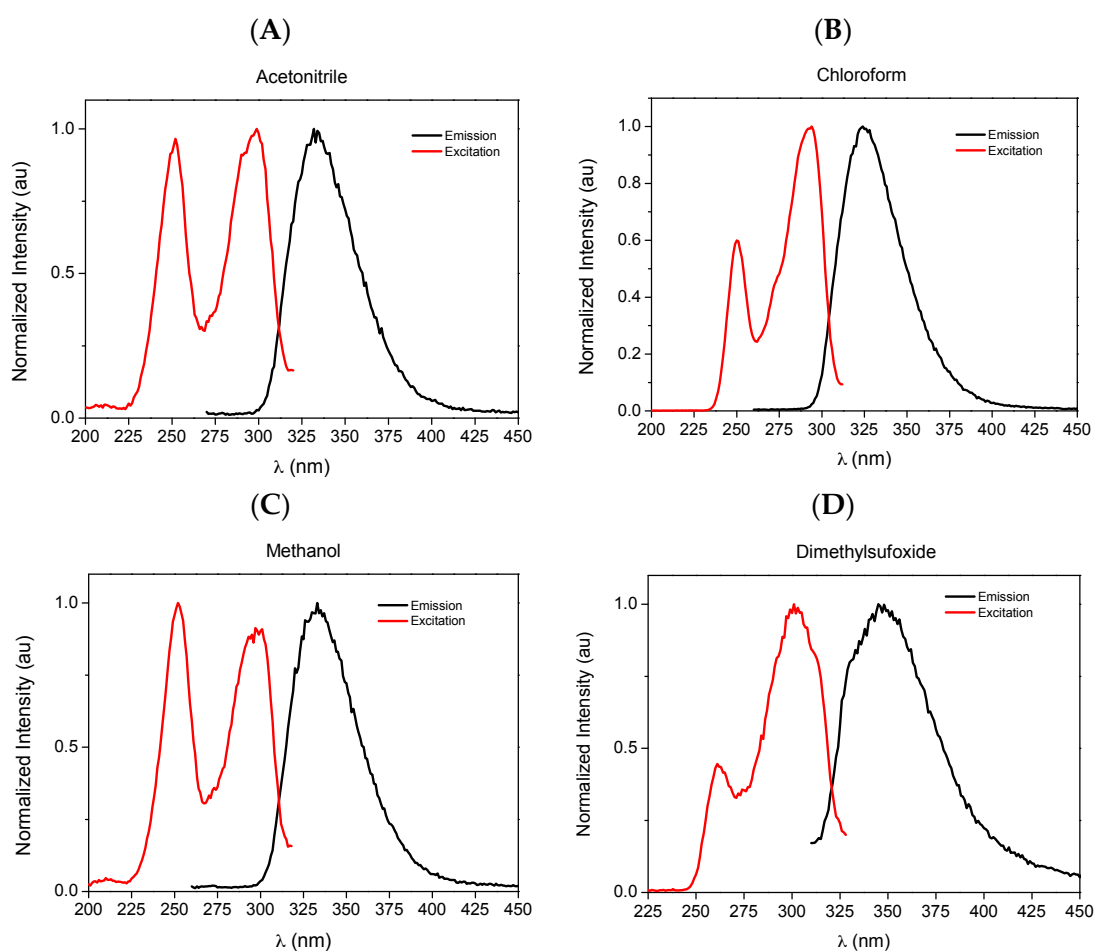

**Figure S3.** Normalized excitation and emission spectra of **1** (0.01 mM) in (A) chloroform, (B) acetonitrile, (C) methanol and (D) dimethylsulfoxide at room temperature under aerobic conditions.

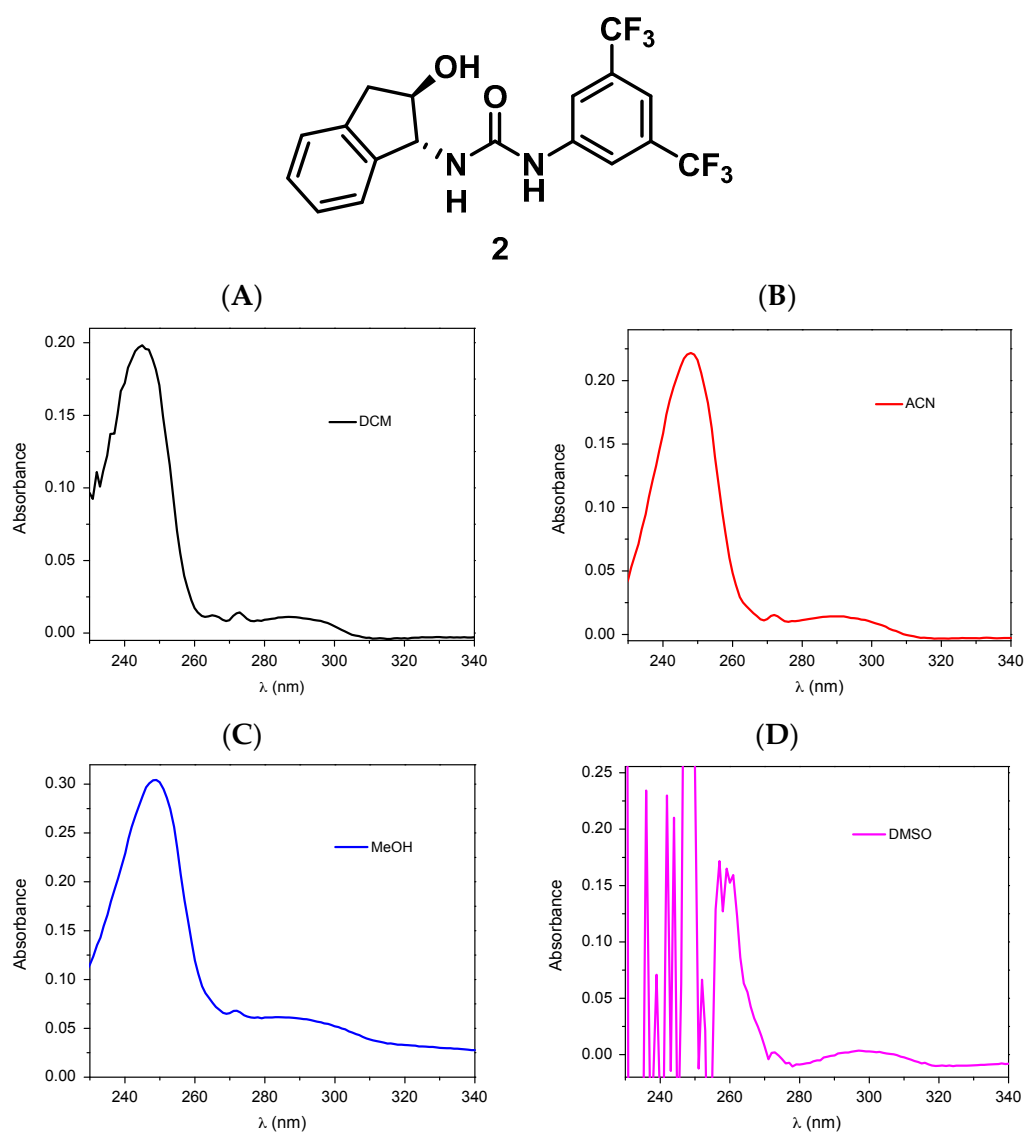

**Figure S4.** Absorption spectra of **2** (0.01 mM) in (A) dichloromethane, (B) acetonitrile, (C) methanol and (D) dimethylsulfoxide at room temperature under aerobic conditions.

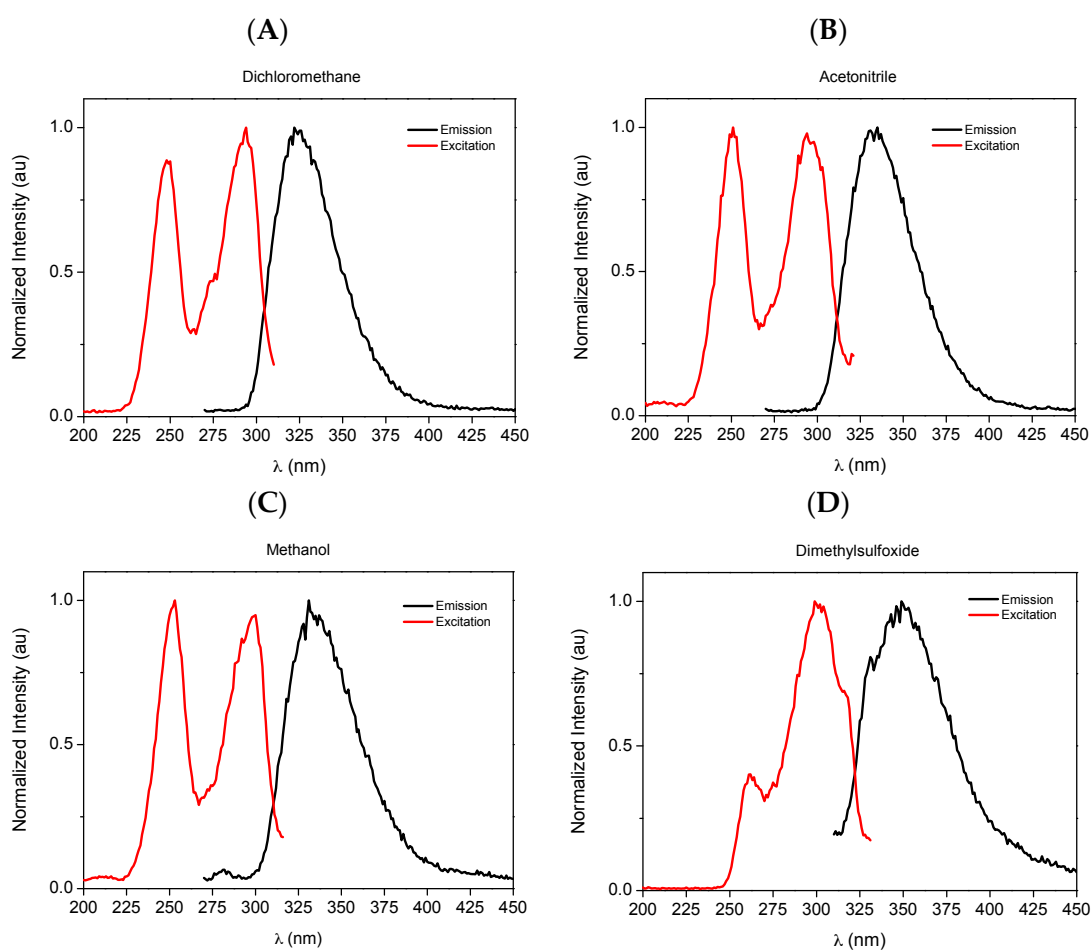

**Figure S5.** Normalized excitation and emission spectra of **2** (0.01 mM) in (A) dichloromethane, (B) acetonitrile, (C) methanol and (D) dimethylsulfoxide at room temperature under aerobic conditions.

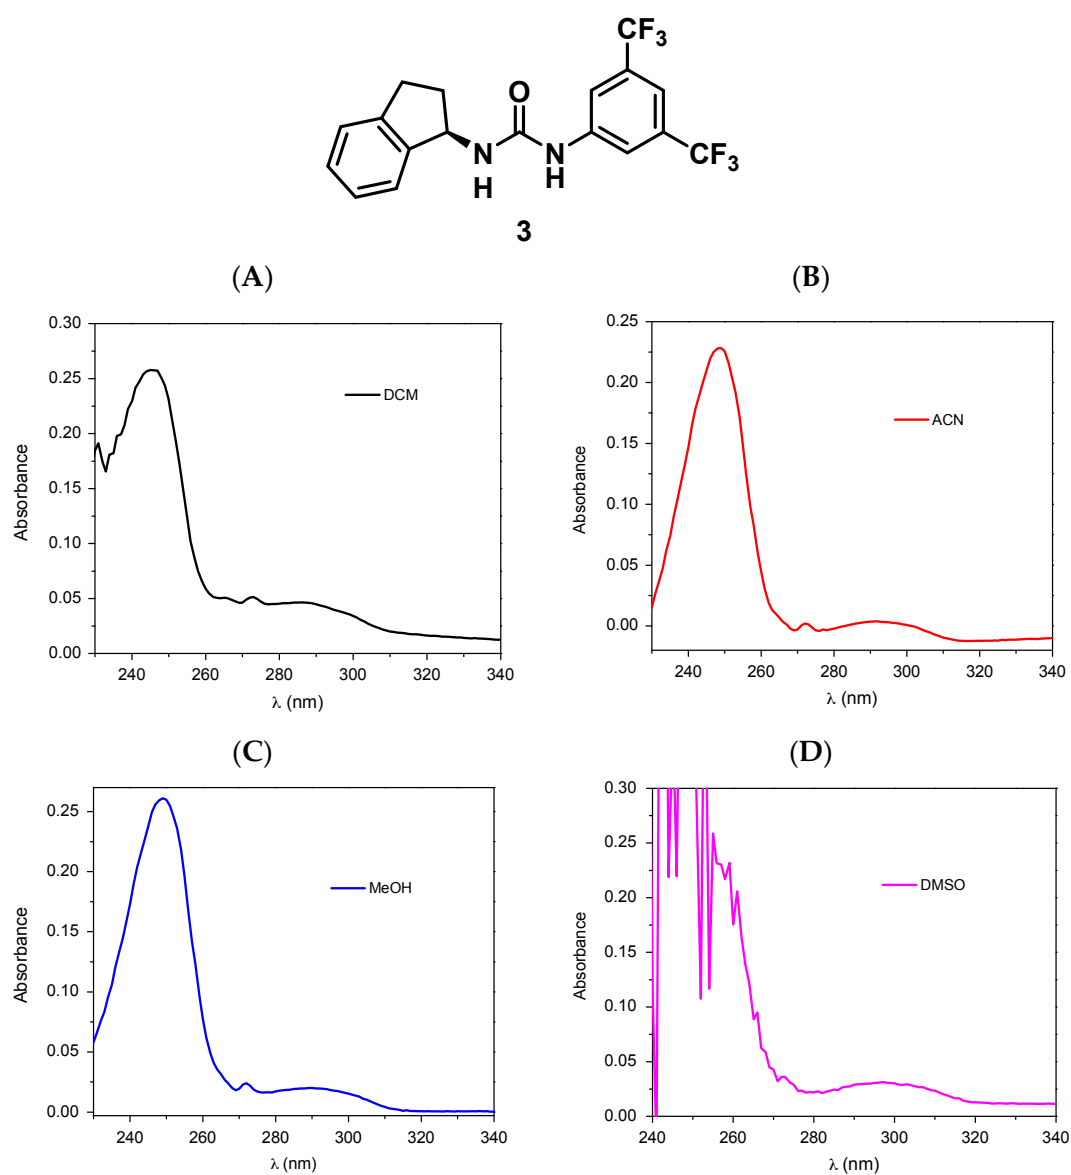

**Figure S6.** Absorption spectra of **3** (0.01 mM) in (A) dichloromethane, (B) acetonitrile, (C) methanol and (D) dimethylsulfoxide at room temperature under aerobic conditions.

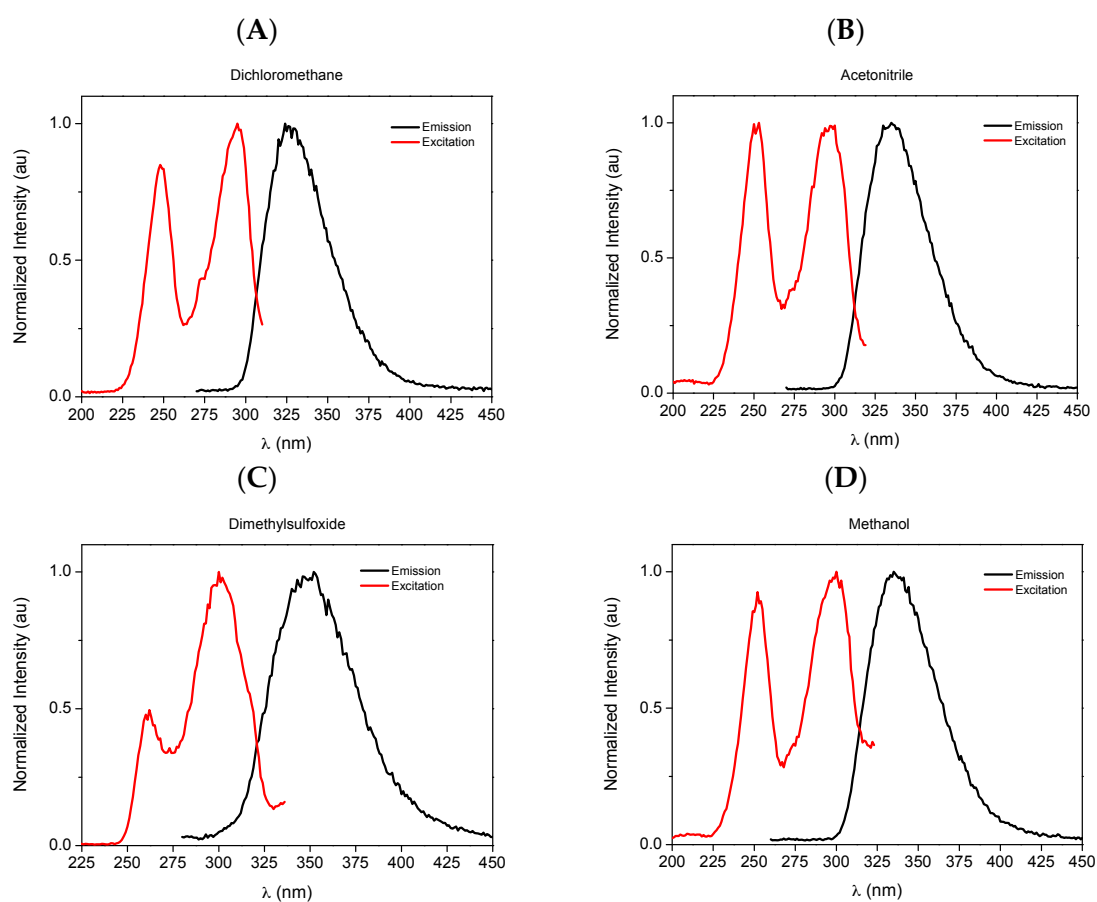

**Figure S7.** Normalized excitation and emission spectra of **3** (0.01 mM) in (A) dichloromethane, (B) acetonitrile, (C) methanol and (D) dimethylsulfoxide at room temperature under aerobic conditions.

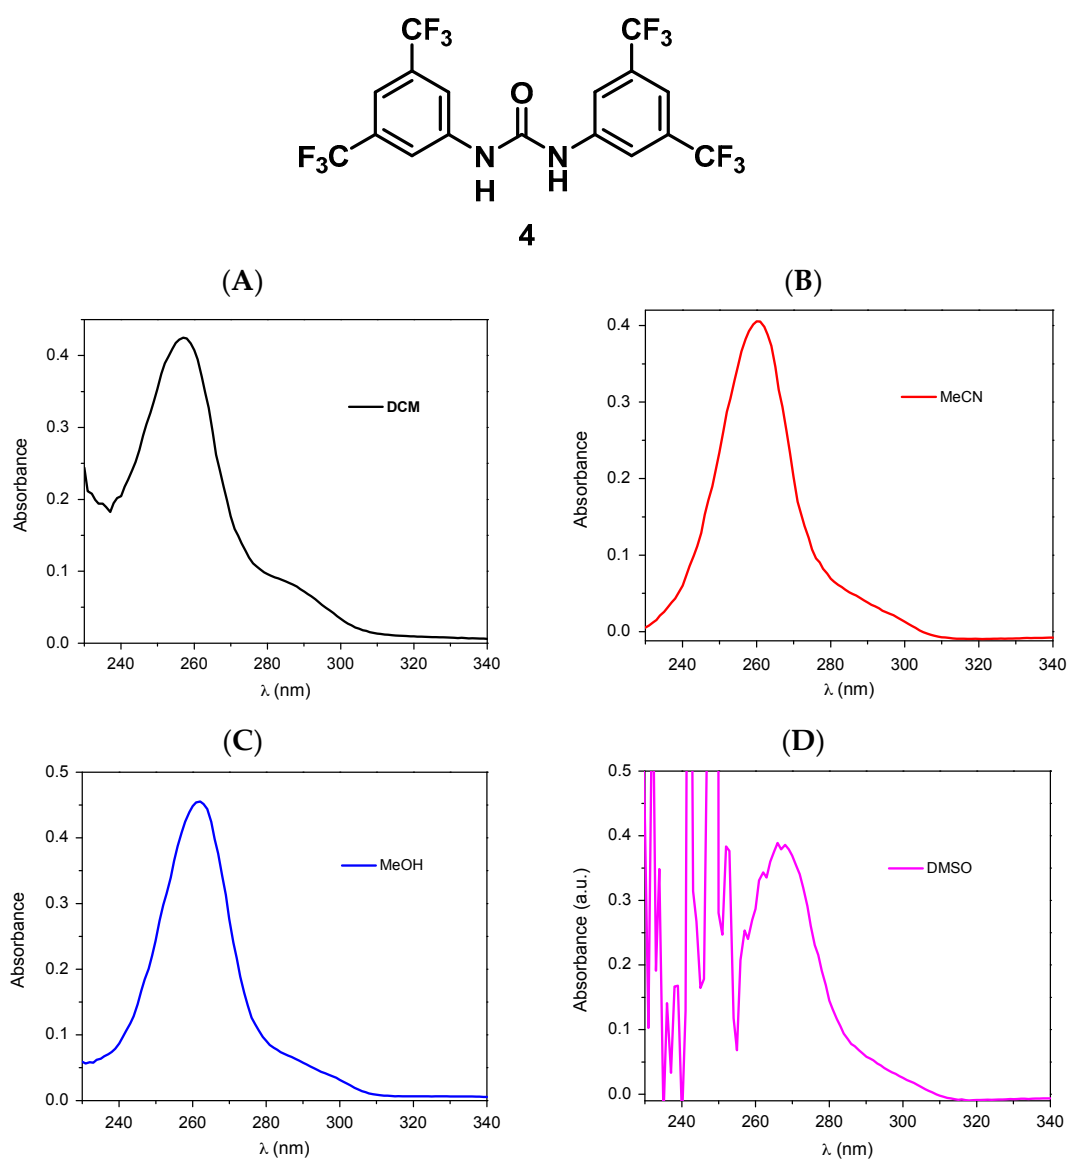

**Figure S8.** Absorption spectra of **4** (0.01 mM) in (A) dichloromethane, (B) acetonitrile, (C) methanol and (D) dimethylsulfoxide at room temperature under aerobic conditions.



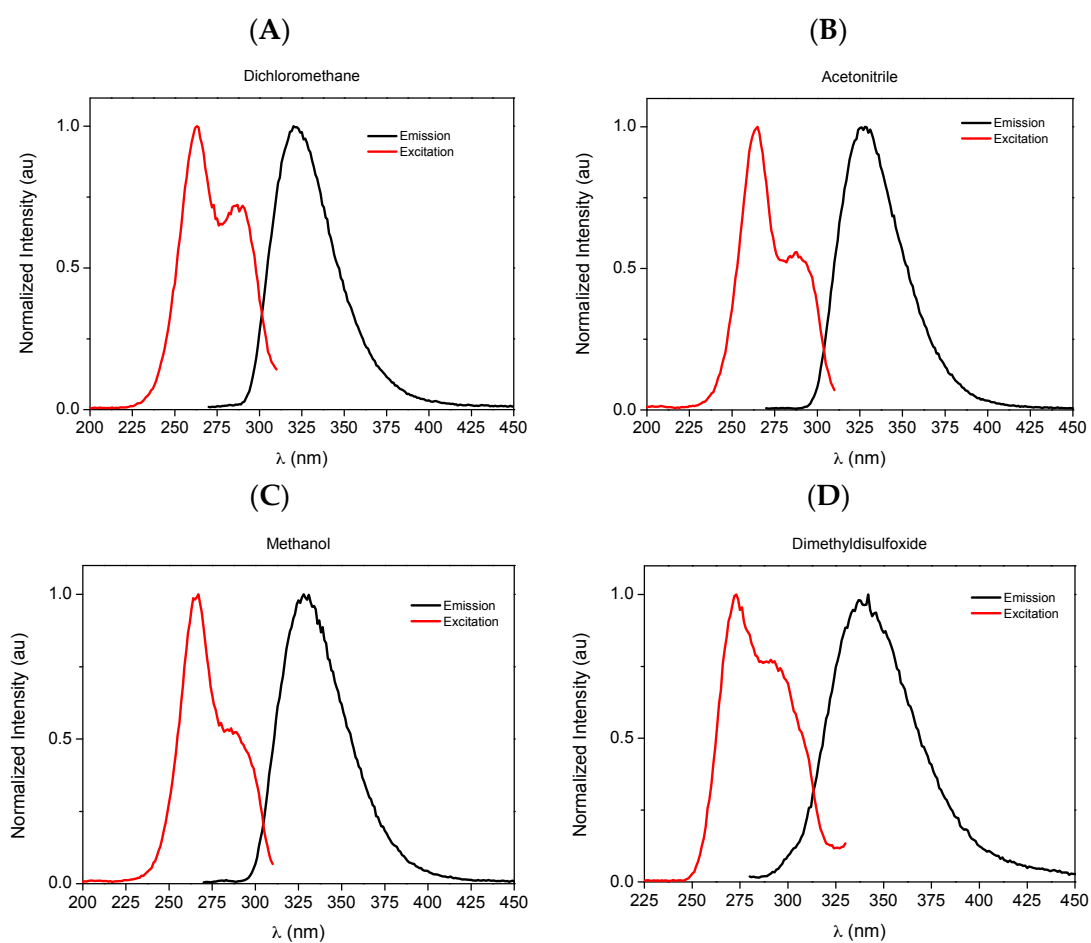

**Figure S9.** Normalized excitation and emission spectra of **4** (0.01 mM) in (A) dichloromethane, (B) acetonitrile, (C) methanol and (D) dimethylsulfoxide at room temperature under aerobic conditions.

**Table S1.** Photophysical data of sensor 2 ( $c = 10^{-5}$  M).

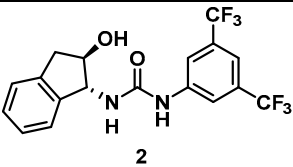

2

| Solvent | $\lambda_{\text{abs}}$ (nm)<br>( $\pi\pi^*/n\pi^*$ ) | $\log \epsilon$ ( $\text{M}^{-1}\cdot\text{cm}^{-1}$ ) ( $\pi\pi^*$ ) | $\lambda_{\text{em}}$ (nm) | Stokes<br>( $\text{cm}^{-1}$ ) | Singlet Energy (eV) |
|---------|------------------------------------------------------|-----------------------------------------------------------------------|----------------------------|--------------------------------|---------------------|
| DCM     | 248/294                                              | 4.28                                                                  | 322                        | 2957                           | 4.07                |
| ACN     | 251/294                                              | 4.38                                                                  | 332                        | 4162                           | 3.98                |
| MeOH    | 253/300                                              | 4.42                                                                  | 335                        | 3121                           | 3.99                |
| DMSO    | -/299                                                | -                                                                     | 349                        | 4791                           | 3.95                |

**Table S2.** Photophysical data of sensor 3 ( $c = 10^{-5}$  M).

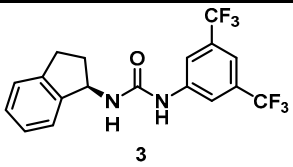

3

| Solvent | $\lambda_{\text{abs}}$ (nm)<br>( $\pi\pi^*/n\pi^*$ ) | $\log \epsilon$ ( $\text{M}^{-1}\cdot\text{cm}^{-1}$ ) ( $\pi\pi^*$ ) | $\lambda_{\text{em}}$ (nm) | Stokes<br>( $\text{cm}^{-1}$ ) | Singlet Energy (eV) |
|---------|------------------------------------------------------|-----------------------------------------------------------------------|----------------------------|--------------------------------|---------------------|
| DCM     | 248/295                                              | 4.40                                                                  | 324                        | 3034                           | 4.05                |
| ACN     | 253/297                                              | 4.28                                                                  | 335                        | 3819                           | 3.97                |
| MeOH    | 253/300                                              | 4.39                                                                  | 335                        | 3482                           | 3.94                |
| DMSO    | -/300                                                | -                                                                     | 350                        | 4761                           | 3.86                |

**Table S3.** Photophysical data of sensor 4 ( $c = 10^{-5}$  M).

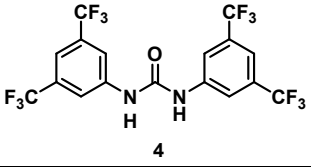

4

| Solvent | $\lambda_{\text{abs}}$ (nm) ( $\pi\pi^*/n\pi^*$ ) | $\log \epsilon$ ( $\text{M}^{-1}\cdot\text{cm}^{-1}$ ) ( $\pi\pi^*$ ) | $\lambda_{\text{em}}$<br>(nm) | Stokes<br>( $\text{cm}^{-1}$ ) | Singlet Energy<br>(eV) |
|---------|---------------------------------------------------|-----------------------------------------------------------------------|-------------------------------|--------------------------------|------------------------|
| DCM     | 263/287                                           | 4.54                                                                  | 320                           | 3593                           | 4.11                   |
| ACN     | 265/288                                           | 4.54                                                                  | 328                           | 4234                           | 4.08                   |
| MeOH    | 267/286                                           | 4.58                                                                  | 328                           | 4477                           | 4.07                   |
| DMSO    | -/291                                             | -                                                                     | 340                           | 4952                           | 3.96                   |

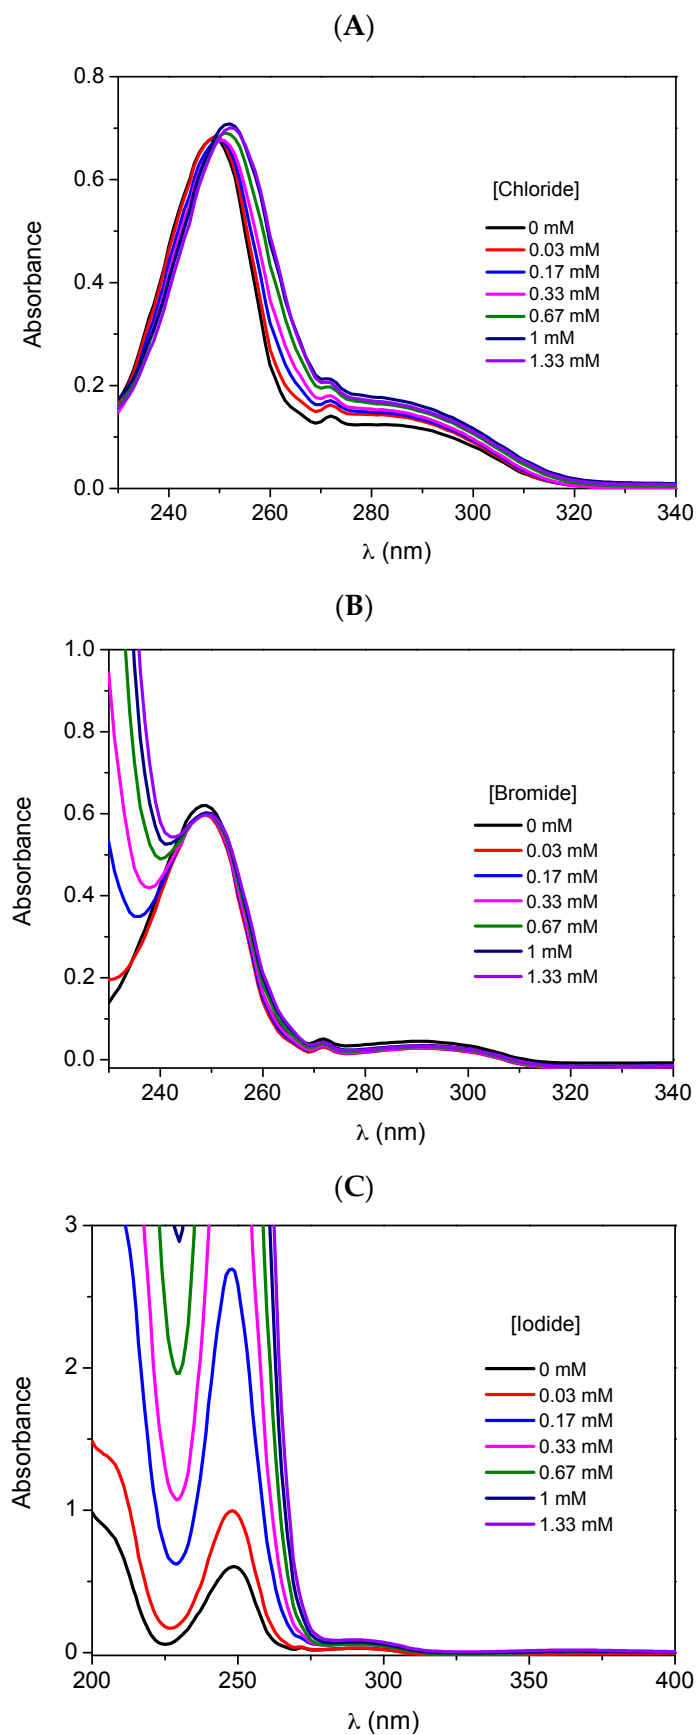

**Figure S10.** Absorption spectra of **1** ( $c = 0.04$  mM) in the absence and with increasing amounts of (A)  $\text{Cl}^-$ , (B)  $\text{Br}^-$  and (C)  $\text{I}^-$  ( $c = 0, 0.03$  mM  $\rightarrow$  1 mM) in acetonitrile at room temperature.

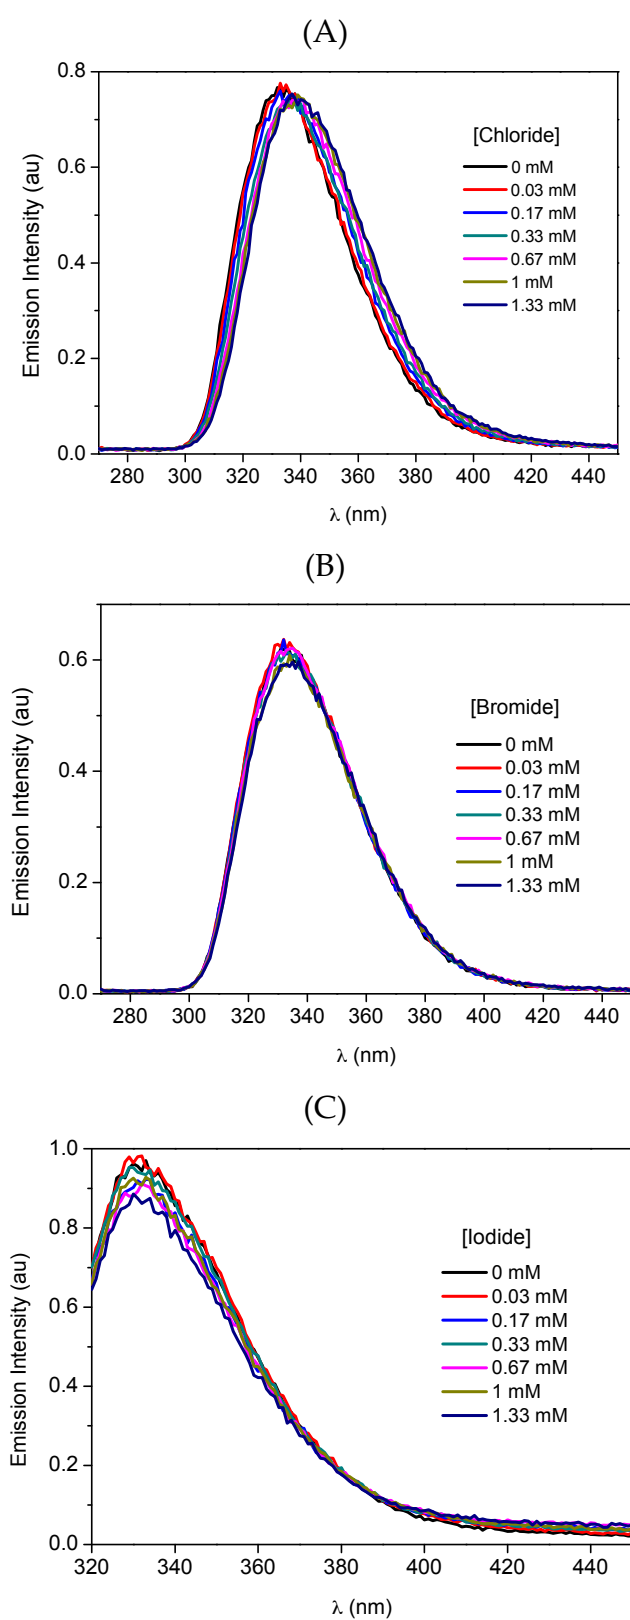

**Figure S11.** Emission spectra of 1 ( $c = 0.04$  mM) in the presence of increasing amounts of (A) chloride ( $\lambda_{\text{exc}} = 252$  nm), (B) bromide ( $\lambda_{\text{exc}} = 252$  nm) and (C) iodide ( $\lambda_{\text{exc}} = 300$  nm) in acetonitrile.

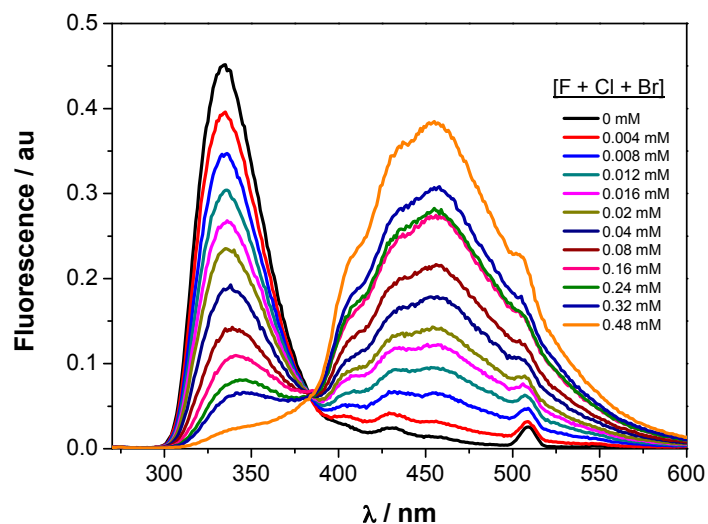

**Figure S12.** Emission spectra of **1** ( $c = 0.04$  mM,  $\lambda_{\text{exc}} = 252$  nm) in the presence of increasing amounts of a mixture of halide anions ( $c = 0, 0.004$  mM  $\rightarrow 0.48$  mM) in acetonitrile.

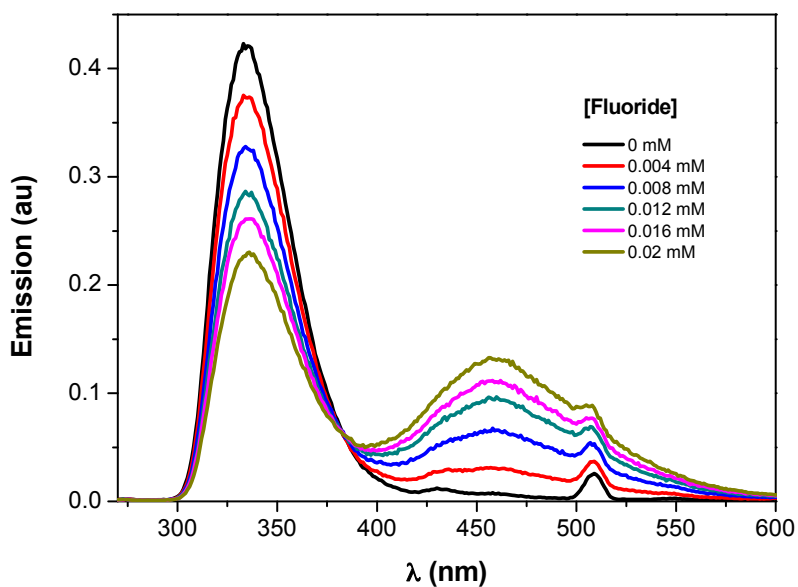

**Figure S13.** Emission spectra of **1** ( $c = 0.04$  mM,  $\lambda_{\text{exc}} = 252$  nm) in the presence of increasing amounts of fluoride ( $c = 0, 0.004$  mM  $\rightarrow 0.02$  mM) in acetonitrile.

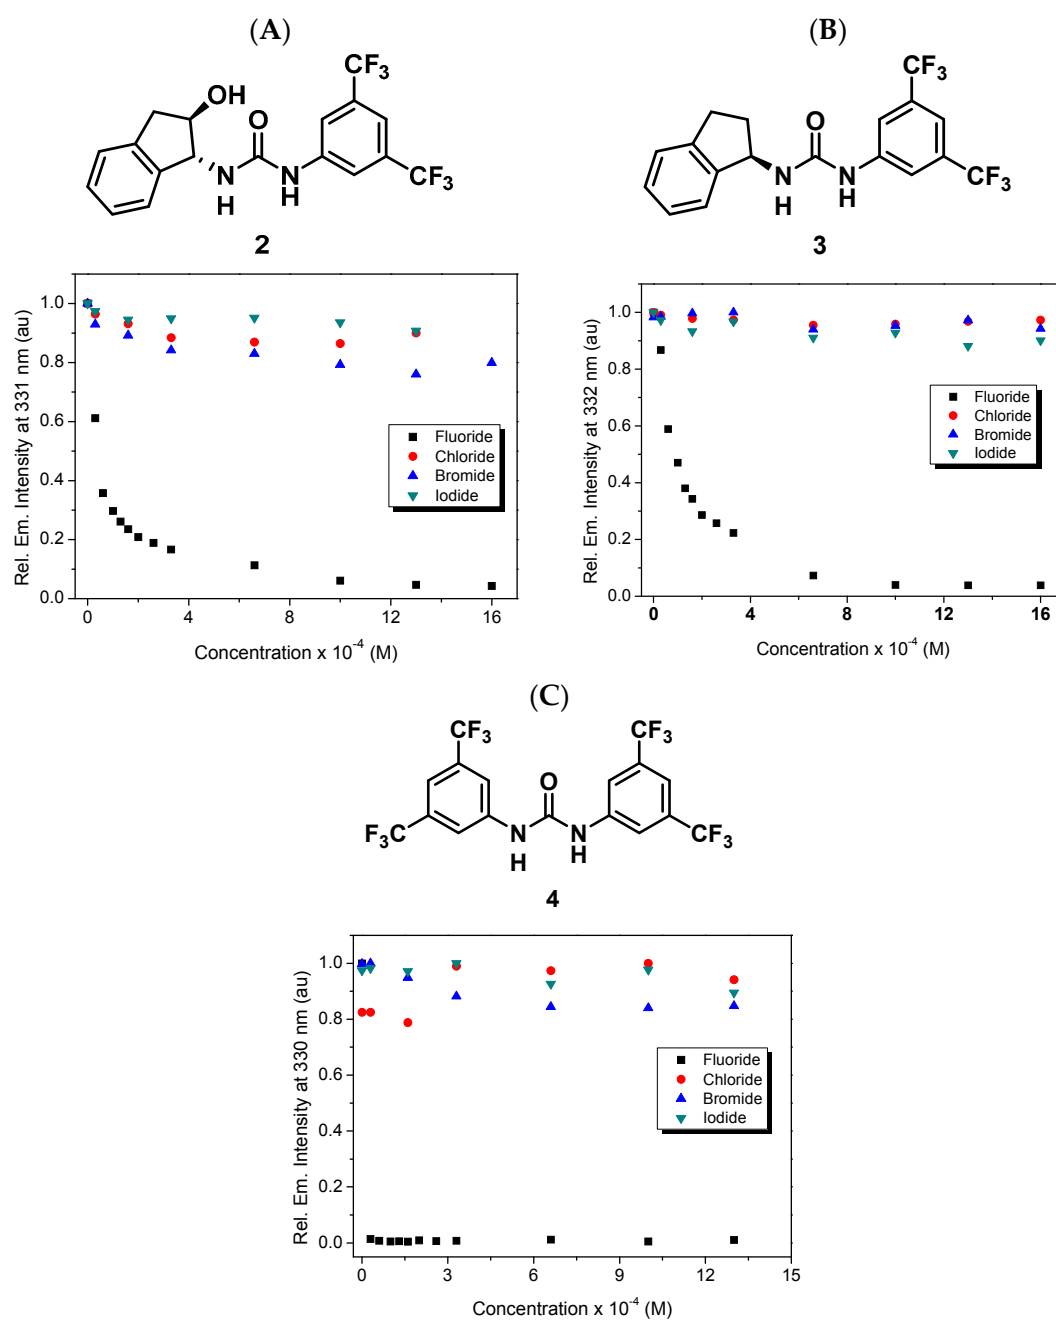

**Figure S14.** Changes in the maximum emission of sensors (A) 2, (B) 3, (C) 4 upon titration with different halides in acetonitrile at room temperature.

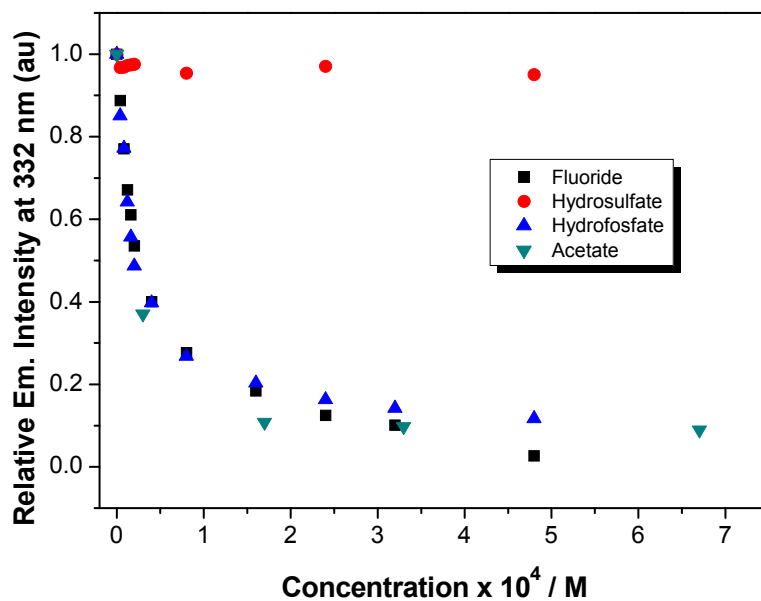

**Figure S15.** Changes in the emission of **1** ( $c = 0.04$  mM,  $\lambda_{exc} = 252$  nm) at 332 nm upon titration with different anions in acetonitrile.

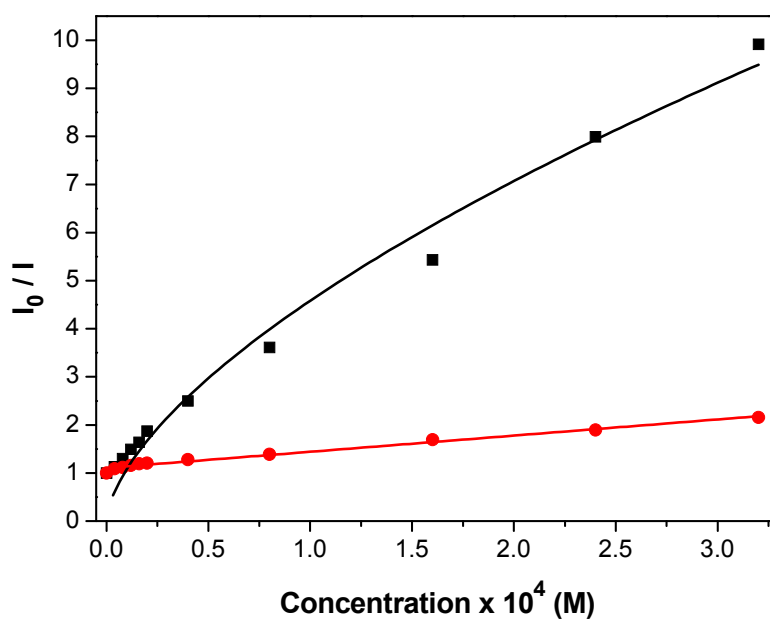

**Figure S16.** Stern-Volmer plots for the fluorescence of **1** ( $c = 0.04$  mM,  $\lambda_{exc} = 252$  nm) upon fluoride (■) and DBU (●) titration ( $c = 0, 0.004$  mM  $\rightarrow$  0.32 mM) in acetonitrile.

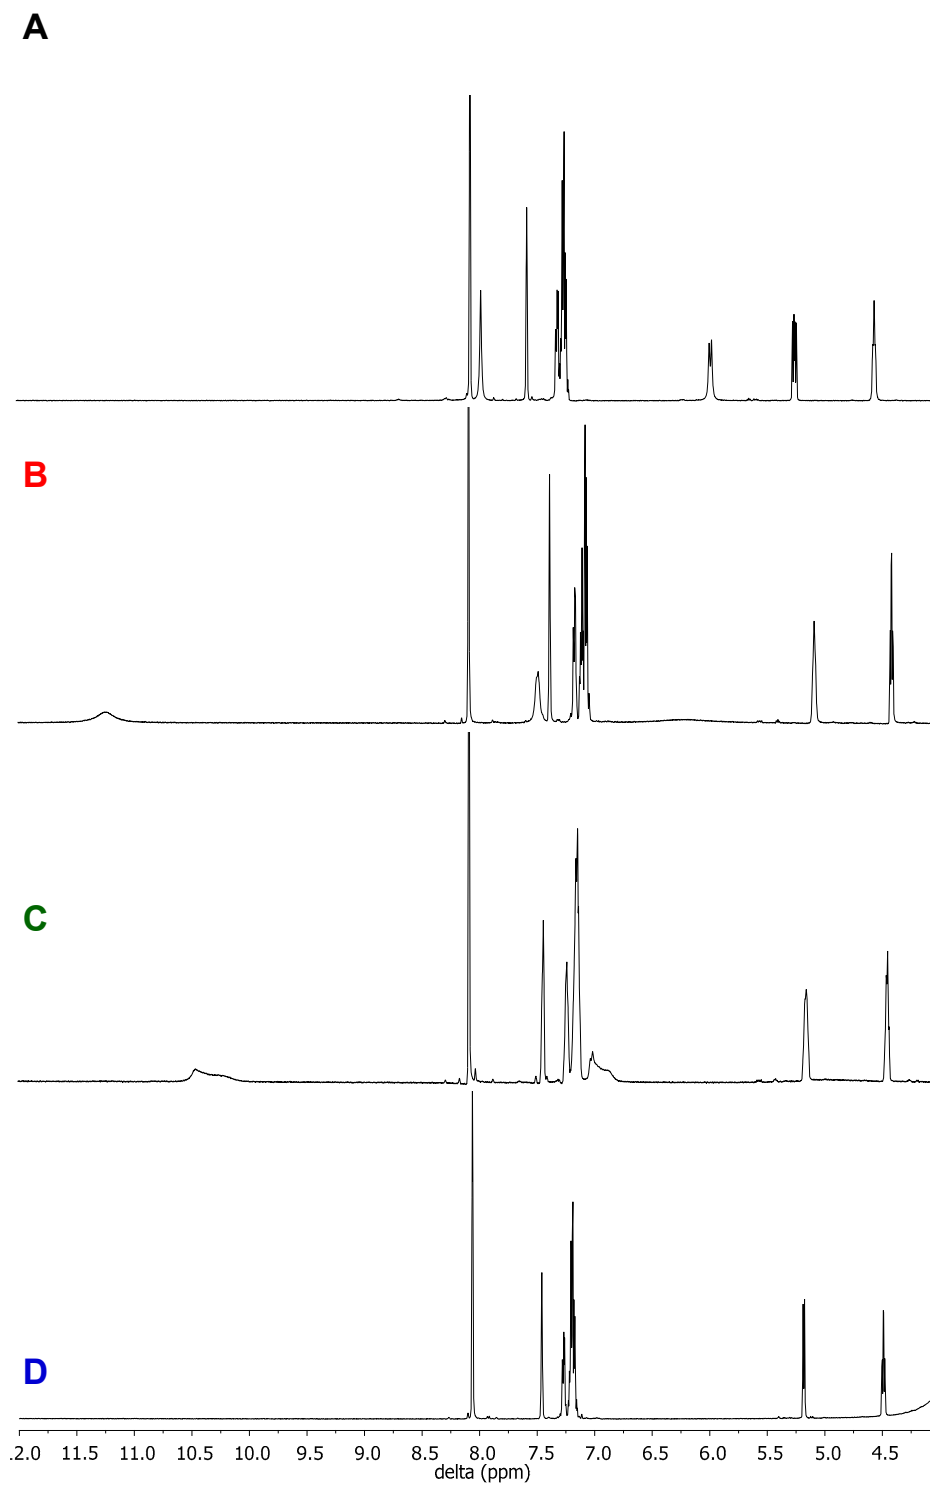

**Figure S17.** Changes in the <sup>1</sup>H-NMR (400 MHz) spectra in CD<sub>3</sub>CN. (A) Sensor 1 (0.02 mmol), (B) sensor 1 + 0.75 eq. of fluoride, (C) sensor 1 + 0.75 eq. of fluoride + one drop of MeOH, (D) sensor 1 + one drop of DBU.



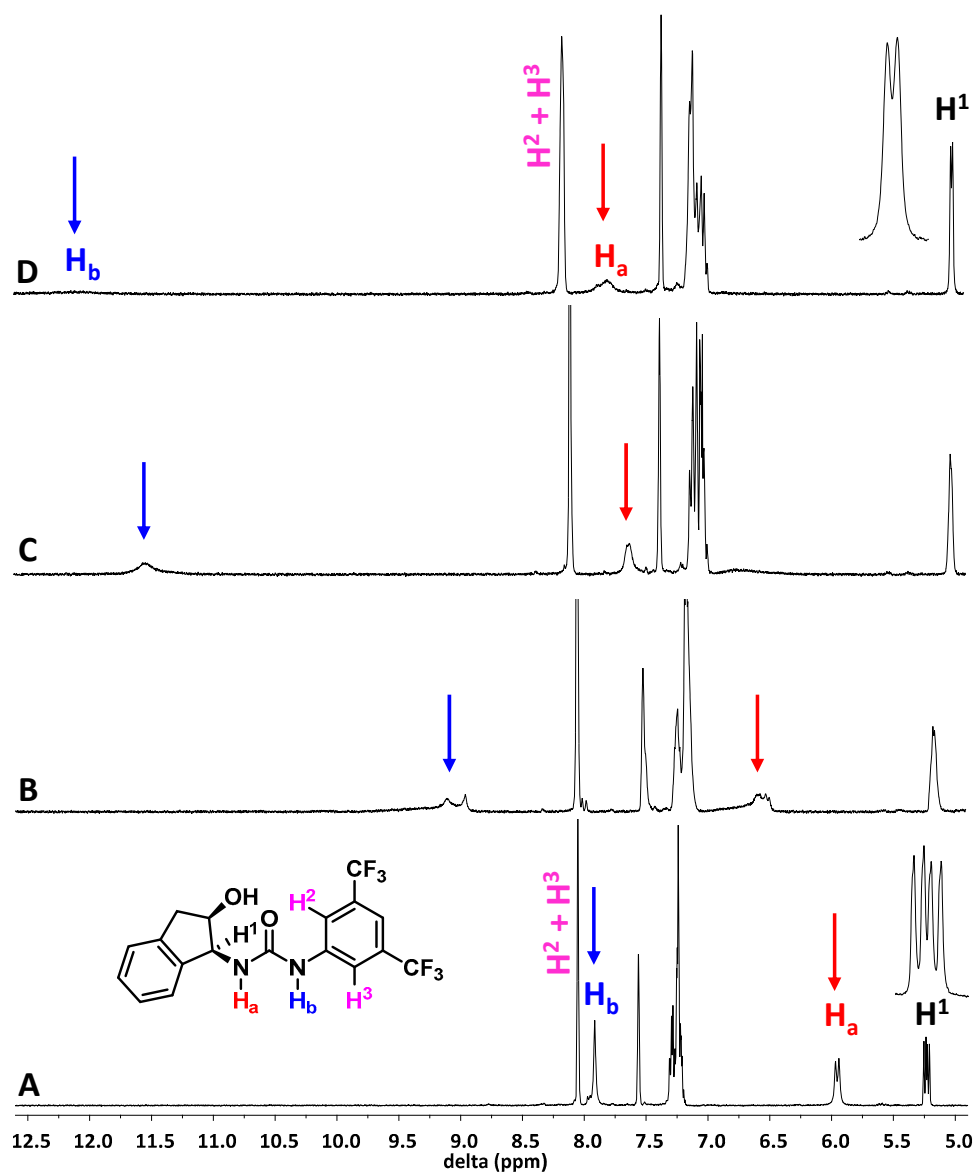

**Figure S18.** Changes in the  $^1\text{H}$  NMR (300 MHz) spectra of **1** in  $\text{CD}_3\text{CN}$  upon addition of  $\text{F}^-$  (A) 0 eq, (B) 0.25 eq, (C) 0.75 eq, (D) 1 eq at room temperature.

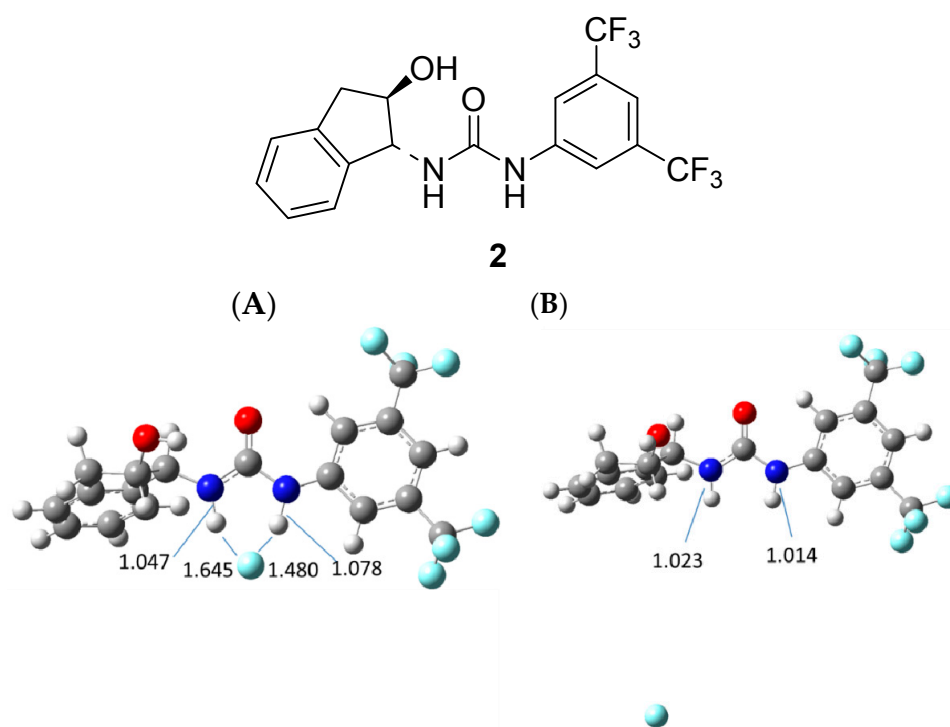

**Figure S19.** Geometries of sensor 2 fluoride bonded (A) and non-bonded fluoride (B).

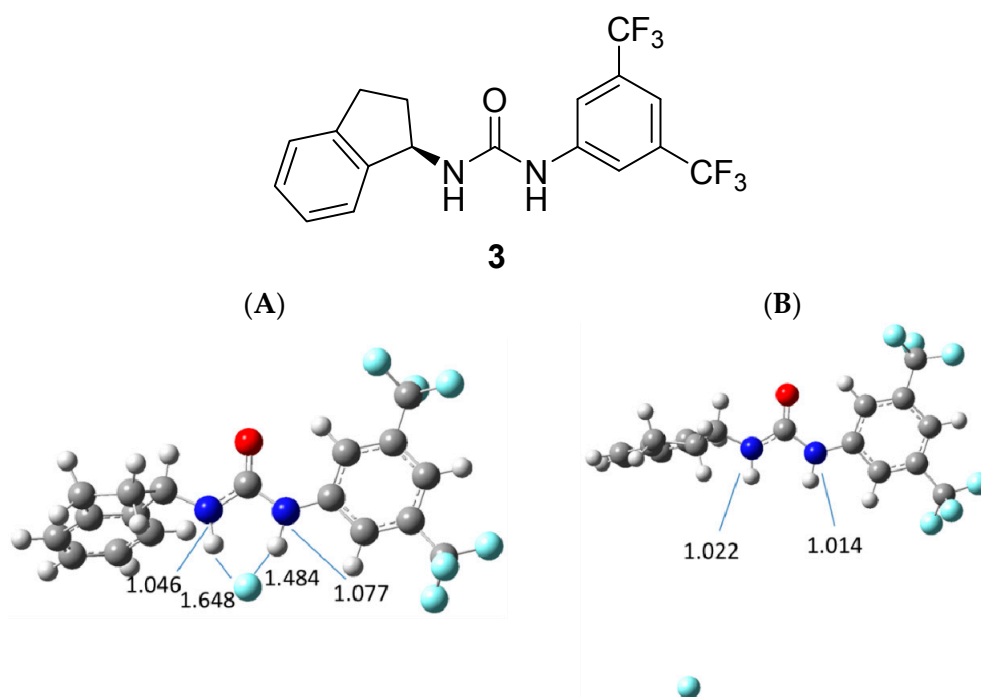

**Figure S20.** Geometries of sensor 3 fluoride bonded (A) and non-bonded fluoride (B).

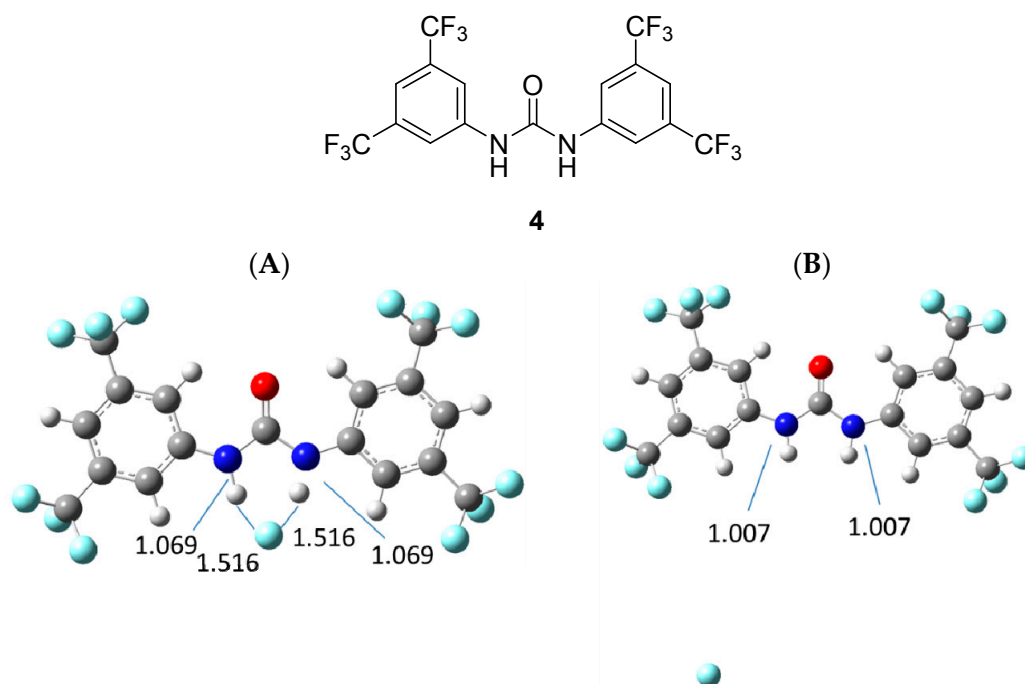

**Figure S21** Geometries of sensor 4 fluoride bonded (A) and non-bonded fluoride (B).

[1-F]

|   |           |           |           |
|---|-----------|-----------|-----------|
| 6 | 6.443693  | 0.703376  | 0.887840  |
| 6 | 5.842143  | 0.104523  | -0.220898 |
| 6 | 4.440910  | 0.037735  | -0.319021 |
| 6 | 3.627100  | 0.558385  | 0.686089  |
| 6 | 4.230579  | 1.157316  | 1.804610  |
| 6 | 5.628190  | 1.231233  | 1.903099  |
| 6 | 6.483649  | -0.535622 | -1.439819 |
| 6 | 5.331775  | -1.379590 | -2.045230 |
| 6 | 4.040388  | -0.613485 | -1.640614 |
| 7 | 2.839569  | -1.418483 | -1.626610 |
| 6 | 1.712174  | -1.032406 | -2.298634 |
| 8 | 1.622516  | 0.041647  | -2.975932 |
| 8 | 5.262713  | -2.691932 | -1.405757 |
| 7 | 0.684485  | -1.957702 | -2.150676 |
| 6 | -0.577059 | -1.913501 | -2.715879 |
| 6 | -1.453501 | -2.982449 | -2.422207 |
| 6 | -2.741488 | -3.014702 | -2.957484 |
| 6 | -3.207114 | -1.998532 | -3.797487 |
| 6 | -2.336519 | -0.942232 | -4.086828 |
| 6 | -1.042715 | -0.881716 | -3.563725 |
| 6 | -2.833063 | 0.192878  | -4.913328 |
| 9 | -3.793249 | -0.198426 | -5.847429 |
| 6 | -3.606714 | -4.186650 | -2.649199 |
| 9 | -3.650357 | -4.475894 | -1.281805 |
| 9 | -1.820437 | 0.834622  | -5.623835 |
| 9 | -3.445731 | 1.193997  | -4.144340 |
| 9 | -4.924472 | -4.017357 | -3.063154 |
| 9 | -3.155635 | -5.365773 | -3.258149 |
| 9 | 1.806073  | -3.625930 | -0.656107 |
| 1 | 2.780937  | -2.335435 | -1.133508 |

|            |           |           |           |
|------------|-----------|-----------|-----------|
| 1          | 0.963855  | -2.782125 | -1.510534 |
| 1          | -1.107635 | -3.777658 | -1.770851 |
| 1          | -0.375961 | -0.064187 | -3.795357 |
| 1          | -4.204079 | -2.032915 | -4.213506 |
| 1          | 5.413157  | -1.496968 | -3.130914 |
| 1          | 2.545891  | 0.494600  | 0.609719  |
| 1          | 7.355004  | -1.155825 | -1.202750 |
| 1          | 7.525408  | 0.754098  | 0.973853  |
| 1          | 3.611887  | 1.562813  | 2.599281  |
| 1          | 6.083517  | 1.693200  | 2.773753  |
| 1          | 3.875214  | 0.176222  | -2.386126 |
| 1          | 5.985750  | -3.259036 | -1.740167 |
| 1          | 6.813705  | 0.225553  | -2.161490 |
| <b>1+F</b> |           |           |           |
| 6          | -1.097960 | -0.790257 | -3.440108 |
| 6          | -0.539592 | -1.912079 | -2.804113 |
| 6          | -1.323321 | -3.058142 | -2.611974 |
| 6          | -2.646783 | -3.090331 | -3.041229 |
| 6          | -3.221216 | -1.987747 | -3.678471 |
| 6          | -2.428770 | -0.847157 | -3.867522 |
| 7          | 0.781826  | -1.989576 | -2.318785 |
| 6          | 1.785532  | -1.024383 | -2.363896 |
| 8          | 1.633378  | 0.133786  | -2.864836 |
| 6          | -3.416498 | -4.357334 | -2.866759 |
| 9          | -3.129675 | -5.309626 | -3.855470 |
| 6          | -3.043860 | 0.368269  | -4.469509 |
| 9          | -3.553042 | 1.248205  | -3.504876 |
| 7          | 2.949823  | -1.449475 | -1.787295 |
| 6          | 4.156593  | -0.626882 | -1.771516 |
| 6          | 4.461589  | 0.086791  | -0.457171 |
| 6          | 5.842400  | 0.033927  | -0.198460 |
| 6          | 6.564841  | -0.730280 | -1.288890 |
| 6          | 5.425391  | -1.496914 | -2.005606 |
| 6          | 3.595246  | 0.748012  | 0.412101  |
| 6          | 4.127151  | 1.359932  | 1.558942  |
| 6          | 5.505530  | 1.310072  | 1.820832  |
| 6          | 6.372267  | 0.644719  | 0.940711  |
| 8          | 5.165814  | -2.764418 | -1.347161 |
| 9          | -4.119759 | 0.066882  | -5.303984 |
| 9          | -2.141583 | 1.113663  | -5.222613 |
| 9          | -3.126518 | -4.987025 | -1.655147 |
| 9          | -4.791025 | -4.163925 | -2.905040 |
| 9          | 4.628435  | -8.162443 | 4.394839  |
| 1          | 3.088493  | -2.393135 | -1.433991 |
| 1          | 1.015456  | -2.867283 | -1.877634 |
| 1          | -0.905642 | -3.919561 | -2.120714 |
| 1          | -0.492679 | 0.091292  | -3.588568 |
| 1          | -4.249298 | -2.013734 | -4.013063 |
| 1          | 5.619552  | -1.665732 | -3.070071 |
| 1          | 2.526426  | 0.790982  | 0.218504  |
| 1          | 7.328574  | -1.420010 | -0.913361 |
| 1          | 7.437696  | 0.601733  | 1.147895  |
| 1          | 3.466660  | 1.874119  | 2.249992  |

|            |   |           |           |           |
|------------|---|-----------|-----------|-----------|
|            | 1 | 5.902167  | 1.785110  | 2.712716  |
|            | 1 | 4.060297  | 0.110506  | -2.576962 |
|            | 1 | 5.756356  | -3.463620 | -1.681919 |
|            | 1 | 7.059645  | -0.042291 | -1.987932 |
| <b>1+F</b> |   |           |           |           |
|            | 6 | -1.097960 | -0.790257 | -3.440108 |
|            | 6 | -0.539592 | -1.912079 | -2.804113 |
|            | 6 | -1.323321 | -3.058142 | -2.611974 |
|            | 6 | -2.646783 | -3.090331 | -3.041229 |
|            | 6 | -3.221216 | -1.987747 | -3.678471 |
|            | 6 | -2.428770 | -0.847157 | -3.867522 |
|            | 7 | 0.781826  | -1.989576 | -2.318785 |
|            | 6 | 1.785532  | -1.024383 | -2.363896 |
|            | 8 | 1.633378  | 0.133786  | -2.864836 |
|            | 6 | -3.416498 | -4.357334 | -2.866759 |
|            | 9 | -3.129675 | -5.309626 | -3.855470 |
|            | 6 | -3.043860 | 0.368269  | -4.469509 |
|            | 9 | -3.553042 | 1.248205  | -3.504876 |
|            | 7 | 2.949823  | -1.449475 | -1.787295 |
|            | 6 | 4.156593  | -0.626882 | -1.771516 |
|            | 6 | 4.461589  | 0.086791  | -0.457171 |
|            | 6 | 5.842400  | 0.033927  | -0.198460 |
|            | 6 | 6.564841  | -0.730280 | -1.288890 |
|            | 6 | 5.425391  | -1.496914 | -2.005606 |
|            | 6 | 3.595246  | 0.748012  | 0.412101  |
|            | 6 | 4.127151  | 1.359932  | 1.558942  |
|            | 6 | 5.505530  | 1.310072  | 1.820832  |
|            | 6 | 6.372267  | 0.644719  | 0.940711  |
|            | 8 | 5.165814  | -2.764418 | -1.347161 |
|            | 9 | -4.119759 | 0.066882  | -5.303984 |
|            | 9 | -2.141583 | 1.113663  | -5.222613 |
|            | 9 | -3.126518 | -4.987025 | -1.655147 |
|            | 9 | -4.791025 | -4.163925 | -2.905040 |
|            | 9 | 4.628435  | -8.162443 | 4.394839  |
|            | 1 | 3.088493  | -2.393135 | -1.433991 |
|            | 1 | 1.015456  | -2.867283 | -1.877634 |
|            | 1 | -0.905642 | -3.919561 | -2.120714 |
|            | 1 | -0.492679 | 0.091292  | -3.588568 |
|            | 1 | -4.249298 | -2.013734 | -4.013063 |
|            | 1 | 5.619552  | -1.665732 | -3.070071 |
|            | 1 | 2.526426  | 0.790982  | 0.218504  |
|            | 1 | 7.328574  | -1.420010 | -0.913361 |
|            | 1 | 7.437696  | 0.601733  | 1.147895  |
|            | 1 | 3.466660  | 1.874119  | 2.249992  |
|            | 1 | 5.902167  | 1.785110  | 2.712716  |
|            | 1 | 4.060297  | 0.110506  | -2.576962 |
|            | 1 | 5.756356  | -3.463620 | -1.681919 |
|            | 1 | 7.059645  | -0.042291 | -1.987932 |
| <b>2+F</b> |   |           |           |           |
|            | 6 | 6.520822  | 0.461383  | 1.006385  |
|            | 6 | 5.881556  | 0.027823  | -0.156908 |
|            | 6 | 4.480237  | 0.101881  | -0.265503 |
|            | 6 | 3.705202  | 0.609920  | 0.776916  |

|       |           |           |           |
|-------|-----------|-----------|-----------|
| 6     | 4.348008  | 1.046055  | 1.946569  |
| 6     | 5.744504  | 0.971383  | 2.059685  |
| 6     | 6.473636  | -0.536604 | -1.432672 |
| 6     | 5.263693  | -1.242216 | -2.097330 |
| 6     | 4.028763  | -0.423429 | -1.622157 |
| 7     | 2.794899  | -1.196578 | -1.581053 |
| 6     | 1.690415  | -0.951968 | -2.345614 |
| 8     | 1.590158  | 0.036438  | -3.122295 |
| 1     | 5.170113  | -2.278505 | -1.796653 |
| 7     | 0.682822  | -1.901822 | -2.172784 |
| 6     | -0.593463 | -1.913148 | -2.751115 |
| 6     | -1.048966 | -0.932105 | -3.651846 |
| 6     | -2.341746 | -1.025765 | -4.175857 |
| 6     | -3.206900 | -2.067014 | -3.830880 |
| 6     | -2.742927 | -3.034568 | -2.935936 |
| 6     | -1.456043 | -2.968004 | -2.399764 |
| 6     | -3.606431 | -4.196147 | -2.580128 |
| 9     | -4.950219 | -3.977000 | -2.864439 |
| 6     | -2.827450 | 0.063177  | -5.070835 |
| 9     | -1.821610 | 0.576547  | -5.888045 |
| 9     | -3.249412 | -5.363110 | -3.267296 |
| 9     | -3.525673 | -4.523694 | -1.225630 |
| 9     | -3.329878 | 1.160020  | -4.358141 |
| 9     | -3.859713 | -0.349976 | -5.909561 |
| 9     | 5.277122  | -7.827797 | 3.824020  |
| 1     | 2.819192  | -2.007412 | -0.957179 |
| 1     | 0.888312  | -2.678935 | -1.555303 |
| 1     | -1.122232 | -3.726603 | -1.700496 |
| 1     | -0.388324 | -0.125534 | -3.931705 |
| 1     | -4.203954 | -2.125378 | -4.244625 |
| 8     | 5.297434  | -1.195136 | -3.556178 |
| 1     | 2.623946  | 0.658120  | 0.691896  |
| 1     | 7.340946  | -1.185845 | -1.286829 |
| 1     | 7.600756  | 0.400074  | 1.101550  |
| 1     | 3.760518  | 1.438656  | 2.770385  |
| 1     | 6.229000  | 1.305833  | 2.971650  |
| 1     | 3.868501  | 0.393853  | -2.334654 |
| 1     | 6.791015  | 0.275717  | -2.102829 |
| 1     | 5.982517  | -1.807277 | -3.892604 |
| [3-F] |           |           |           |
| 6     | -1.063586 | -0.880767 | -3.622510 |
| 6     | -0.596219 | -1.856015 | -2.736582 |
| 6     | -1.420520 | -2.935779 | -2.372678 |
| 6     | -2.714416 | -3.050803 | -2.883810 |
| 6     | -3.186457 | -2.069497 | -3.769975 |
| 6     | -2.365322 | -0.992299 | -4.137621 |
| 6     | 0.755403  | -1.960788 | -2.050805 |
| 6     | 0.497318  | -2.990331 | -0.915526 |
| 6     | -0.686567 | -3.876191 | -1.419997 |
| 7     | -1.509776 | -4.422443 | -0.355394 |
| 6     | -1.632951 | -5.765029 | -0.132166 |
| 8     | -1.048648 | -6.660436 | -0.821197 |
| 1     | 1.380970  | -3.585156 | -0.665899 |

|     |           |            |           |
|-----|-----------|------------|-----------|
| 7   | -2.480367 | -6.022609  | 0.944860  |
| 6   | -2.847094 | -7.253723  | 1.457895  |
| 6   | -2.393318 | -8.498083  | 0.962990  |
| 6   | -2.827877 | -9.684402  | 1.559574  |
| 6   | -3.712152 | -9.691946  | 2.642993  |
| 6   | -4.159565 | -8.458302  | 3.126870  |
| 6   | -3.740304 | -7.257448  | 2.554148  |
| 6   | -5.053081 | -8.406791  | 4.316851  |
| 9   | -5.682779 | -9.620313  | 4.578883  |
| 6   | -2.397558 | -10.982374 | 0.969298  |
| 9   | -1.123492 | -10.928250 | 0.405851  |
| 9   | -4.368833 | -8.066856  | 5.492520  |
| 9   | -6.062400 | -7.449396  | 4.189458  |
| 9   | -3.245275 | -11.415162 | -0.061537 |
| 9   | -2.381204 | -12.021383 | 1.899820  |
| 9   | -3.075163 | -3.662293  | 1.585456  |
| 1   | 0.173032  | -2.468762  | -0.006184 |
| 1   | -2.057076 | -3.817800  | 0.299254  |
| 1   | -2.865876 | -5.117676  | 1.383671  |
| 1   | -4.103072 | -6.309991  | 2.938791  |
| 1   | -1.708673 | -8.503714  | 0.127800  |
| 1   | -4.038698 | -10.618772 | 3.093310  |
| 1   | -3.350923 | -3.879556  | -2.588900 |
| 1   | 1.119197  | -0.998772  | -1.673388 |
| 1   | -0.435292 | -0.040108  | -3.903370 |
| 1   | -4.193348 | -2.141262  | -4.169706 |
| 1   | -2.741730 | -0.235698  | -4.819434 |
| 1   | -0.295508 | -4.737269  | -1.976877 |
| 1   | 1.515476  | -2.335934  | -2.751584 |
| 3+F |           |            |           |
| 6   | 6.519924  | 0.466257   | 1.010587  |
| 6   | 5.877443  | 0.042330   | -0.167654 |
| 6   | 4.474767  | 0.130304   | -0.248090 |
| 6   | 3.753417  | 0.634574   | 0.838004  |
| 6   | 4.381849  | 1.060937   | 2.010402  |
| 6   | 5.774371  | 0.967582   | 2.078477  |
| 7   | 6.684048  | -0.447337  | -1.203255 |
| 6   | 6.278872  | -0.912032  | -2.455946 |
| 8   | 5.070764  | -0.994514  | -2.809976 |
| 6   | 2.276786  | 0.788366   | 0.703098  |
| 9   | 1.621800  | 0.798994   | 1.932343  |
| 6   | 6.485257  | 1.348646   | 3.331590  |
| 9   | 7.688721  | 2.010158   | 3.082479  |
| 7   | 7.320674  | -1.274283  | -3.258414 |
| 6   | 7.189535  | -1.879204  | -4.579961 |
| 6   | 7.946356  | -1.139995  | -5.679172 |
| 6   | 8.518586  | -2.059047  | -6.577752 |
| 6   | 8.179114  | -3.479920  | -6.163237 |
| 6   | 7.781894  | -3.324818  | -4.669560 |
| 6   | 8.100440  | 0.234689   | -5.862829 |
| 6   | 8.846417  | 0.691881   | -6.961221 |
| 6   | 9.420449  | -0.221320  | -7.858614 |
| 6   | 9.257351  | -1.603909  | -7.672657 |

|       |           |           |           |
|-------|-----------|-----------|-----------|
| 1     | 7.038174  | -4.066978 | -4.362054 |
| 9     | 5.727518  | 2.180036  | 4.149768  |
| 9     | 6.824875  | 0.238480  | 4.115153  |
| 9     | 1.697175  | -0.226400 | -0.056705 |
| 9     | 1.918139  | 1.985395  | 0.068903  |
| 9     | 16.136266 | -1.859826 | -2.121850 |
| 1     | 8.625652  | -3.430908 | -3.998126 |
| 1     | 8.282066  | -1.188260 | -2.921058 |
| 1     | 7.678581  | -0.467563 | -1.008867 |
| 1     | 7.600205  | 0.411455  | 1.084979  |
| 1     | 3.976586  | -0.202291 | -1.146150 |
| 1     | 3.809837  | 1.448827  | 2.841661  |
| 1     | 7.662341  | 0.939918  | -5.162825 |
| 1     | 8.979288  | -4.203765 | -6.338401 |
| 1     | 9.708194  | -2.306168 | -8.367856 |
| 1     | 8.983845  | 1.757687  | -7.114242 |
| 1     | 10.000356 | 0.143579  | -8.700726 |
| 1     | 6.115822  | -1.900143 | -4.799767 |
| 1     | 7.312308  | -3.839736 | -6.737887 |
| [4-F] |           |           |           |
| 6     | -5.549110 | -0.030841 | 0.686435  |
| 6     | -4.937613 | -0.024315 | 1.957762  |
| 6     | -5.761820 | -0.070043 | 3.103692  |
| 6     | -7.148625 | -0.119448 | 2.976263  |
| 6     | -7.763265 | -0.131078 | 1.718772  |
| 6     | -6.942647 | -0.088697 | 0.588804  |
| 7     | -3.565504 | 0.013877  | 2.169646  |
| 6     | -2.564384 | 0.053078  | 1.208905  |
| 8     | -2.763431 | 0.087387  | -0.054754 |
| 6     | -7.990936 | -0.244597 | 4.198200  |
| 9     | -9.242862 | 0.351323  | 4.050467  |
| 6     | -7.569624 | -0.026816 | -0.761490 |
| 9     | -6.796670 | -0.640928 | -1.745558 |
| 7     | -1.316347 | 0.048276  | 1.816599  |
| 6     | -0.075038 | 0.046687  | 1.194161  |
| 6     | 0.116840  | 0.044102  | -0.203592 |
| 6     | 1.413878  | 0.039901  | -0.724670 |
| 6     | 2.542445  | 0.032620  | 0.098626  |
| 6     | 2.343332  | 0.040381  | 1.483589  |
| 6     | 1.061664  | 0.041830  | 2.031092  |
| 6     | 3.522221  | -0.029559 | 2.391230  |
| 9     | 3.296288  | 0.588977  | 3.619771  |
| 6     | 1.594542  | -0.037882 | -2.201589 |
| 9     | 2.793849  | 0.531138  | -2.628705 |
| 9     | 3.891111  | -1.347557 | 2.694929  |
| 9     | 4.659160  | 0.561695  | 1.842646  |
| 9     | 1.614778  | -1.358658 | -2.672334 |
| 9     | 0.573772  | 0.595649  | -2.907833 |
| 9     | -7.767862 | 1.288608  | -1.205149 |
| 9     | -8.825968 | -0.629894 | -0.800683 |
| 9     | -8.248307 | -1.579378 | 4.541059  |
| 9     | -7.400884 | 0.326393  | 5.324082  |
| 9     | -2.090325 | 0.002408  | 4.220610  |



|     |           |           |           |
|-----|-----------|-----------|-----------|
| 1   | -3.180326 | 0.001266  | 3.166402  |
| 1   | -5.303552 | -0.060421 | 4.085500  |
| 1   | -4.924927 | 0.000959  | -0.194134 |
| 1   | -8.839922 | -0.173167 | 1.624763  |
| 1   | -1.377168 | 0.029199  | 2.883676  |
| 1   | 0.926716  | 0.051504  | 3.106333  |
| 1   | 3.539313  | 0.041350  | -0.320677 |
| 1   | -0.747824 | 0.054586  | -0.850148 |
| 4+F |           |           |           |
| 6   | 1.084693  | -0.034822 | 2.018017  |
| 6   | -0.053114 | -0.005181 | 1.198963  |
| 6   | 0.115873  | 0.040112  | -0.194194 |
| 6   | 1.403658  | 0.060793  | -0.729878 |
| 6   | 2.538191  | 0.027539  | 0.076658  |
| 6   | 2.357343  | -0.014919 | 1.456853  |
| 7   | -1.297902 | -0.016433 | 1.848522  |
| 6   | -2.564578 | -0.012674 | 1.289452  |
| 8   | -2.788269 | 0.001722  | 0.054568  |
| 6   | 1.565518  | 0.044179  | -2.208858 |
| 9   | 0.537296  | 0.706570  | -2.872059 |
| 6   | 3.546473  | -0.113488 | 2.346696  |
| 9   | 4.674565  | 0.493754  | 1.801367  |
| 7   | -3.568566 | -0.028781 | 2.239386  |
| 6   | -4.950679 | -0.050150 | 2.007635  |
| 6   | -5.523311 | -0.088484 | 0.727935  |
| 6   | -6.911918 | -0.115333 | 0.599095  |
| 6   | -7.757248 | -0.099918 | 1.704129  |
| 6   | -7.178277 | -0.060369 | 2.972871  |
| 6   | -5.795508 | -0.036876 | 3.133181  |
| 6   | -8.048083 | -0.123059 | 4.178754  |
| 9   | -7.461272 | 0.472548  | 5.292375  |
| 6   | -7.503938 | -0.082211 | -0.766476 |
| 9   | -8.771949 | -0.654903 | -0.815814 |
| 9   | -9.279120 | 0.496051  | 3.981433  |
| 9   | -8.341963 | -1.437420 | 4.560128  |
| 9   | -6.723224 | -0.744583 | -1.707911 |
| 9   | -7.658209 | 1.221708  | -1.253276 |
| 9   | 3.334315  | 0.465218  | 3.594825  |
| 9   | 3.916085  | -1.440151 | 2.602558  |
| 9   | 2.760045  | 0.628975  | -2.622587 |
| 9   | 1.578512  | -1.254543 | -2.732223 |
| 9   | -4.510520 | 0.164668  | 11.320423 |
| 1   | -3.293659 | -0.027115 | 3.208656  |
| 1   | -5.368075 | 0.007478  | 4.128881  |
| 1   | -4.885820 | -0.104558 | -0.138687 |
| 1   | -8.830263 | -0.120119 | 1.581530  |
| 1   | -1.248204 | -0.037031 | 2.853956  |
| 1   | 0.971358  | -0.060658 | 3.092870  |
| 1   | 3.528827  | 0.057160  | -0.352613 |
| 1   | -0.751085 | 0.070461  | -0.829869 |
